# Supplementary material for: Ecological and Anthropogenic Spatial Gradients Shape Patterns of Dispersal of Foot-and-Mouth Disease Virus in Uganda
Source: MDPI journal article supplement (doi:10.3390/pathogens11050524), 2022-04-29

Supplemental Table S1. Marginal likelihoods of the path sampling/stepping-stone sampling under the molecular clock-population model combinations tested. The mean of the marginal likelihood of two Markov Chain Monte Carlo runs is shown. The best-fitting combination is highlighted.

|                       | Molecular clock model |                         |                                       |                         |
|-----------------------|-----------------------|-------------------------|---------------------------------------|-------------------------|
|                       | <b>Strict</b>         |                         | <b>Uncorrelated lognormal relaxed</b> |                         |
| Population model      | path sampling         | stepping stone sampling | path sampling                         | stepping stone sampling |
| constant              | -2077.7891            | -2077.80785             | -2080.23665                           | -2080.802               |
| exponential           | -2085.69035           | -2082.14985             | -2081.09105                           | -2081.2094              |
| GMRF Bayesian skyride | -2098.08835           | -2098.2986              | -2082.68895                           | -2082.8077              |
| logistic              | -2079.553             | -2079.90305             | -2081.3336                            | -2081.3028              |

Supplemental Table S2. Sources of covariate data.

| <b>Environmental raster</b>              | <b>Source</b>                                                                                                                                   | <b>URL</b>                                                                                                                                                                                                                        |
|------------------------------------------|-------------------------------------------------------------------------------------------------------------------------------------------------|-----------------------------------------------------------------------------------------------------------------------------------------------------------------------------------------------------------------------------------|
| Mean annual rainfall                     | bioclim via R package <i>raster</i> v 3.1-5                                                                                                     | <a href="http://www.worldclim.org">www.worldclim.org</a>                                                                                                                                                                          |
| Cattle density                           | 2008 National Livestock Census data (Ministry of Agriculture, Animal, Industry, and Fisheries); raster generated manually in ArcGIS Pro (2.4.0) | <a href="https://www.ubos.org/wp-content/uploads/publications/05_2019THE_NATIONAL_LIVESTOCK_CENSUS_REPORT_2008.pdf">https://www.ubos.org/wp-content/uploads/publications/05_2019THE_NATIONAL_LIVESTOCK_CENSUS_REPORT_2008.pdf</a> |
| Human population density                 | Gridded Population of the World v4.11 2015                                                                                                      | <a href="https://sedac.ciesin.columbia.edu/data/set/gpw-v4-population-density-rev11">https://sedac.ciesin.columbia.edu/data/set/gpw-v4-population-density-rev11</a>                                                               |
| Distance to nearest livestock market     | Market locations: Famine Early Warning Systems Network; map generated, distances calculated using ArcGIS Pro                                    | <a href="https://fews.net/east-africa/uganda/production-and-trade-flow-maps/january-2017-3">https://fews.net/east-africa/uganda/production-and-trade-flow-maps/january-2017-3</a>                                                 |
| Distance to nearest major roadway        | Roadway locations: The World Bank Data Catalog; distance raster generated using ArcGIS Pro                                                      | <a href="https://datacatalog.worldbank.org/dataset/uganda-roads">https://datacatalog.worldbank.org/dataset/uganda-roads</a>                                                                                                       |
| Distance to nearest international border | Shapefile: Humanitarian Data Exchange; distances calculated using ArcGIS Pro                                                                    | <a href="https://data.world/ocha-rosea/6d6d1495-196b-49d0-86b9-dc9022cde8e7">https://data.world/ocha-rosea/6d6d1495-196b-49d0-86b9-dc9022cde8e7</a>                                                                               |

Supplemental Table S3. Pearson correlation matrix for the predictors used in the step selection function (SSF) analysis.

| <b>Environmental factor</b>              | mean annual rainfall | cattle density | human population density | distance to livestock market | distance to roadway | distance to nearest international border |
|------------------------------------------|----------------------|----------------|--------------------------|------------------------------|---------------------|------------------------------------------|
| mean annual rainfall                     | 1                    | 0.032          | 0.26                     | -0.174                       | -0.328              | -0.266                                   |
| cattle density                           | 0.032                | 1              | 0.423                    | -0.536                       | 0.034               | -0.517                                   |
| human population density                 | 0.26                 | 0.423          | 1                        | -0.536                       | -0.405              | -0.458                                   |
| distance to livestock market             | -0.174               | -0.536         | -0.536                   | 1                            | 0.335               | 0.347                                    |
| distance to roadway                      | -0.328               | 0.034          | -0.405                   | 0.335                        | 1                   | 0.052                                    |
| distance to nearest international border | -0.266               | -0.517         | -0.458                   | 0.347                        | 0.052               | 1                                        |

Supplemental Table S4. Cutoffs for the covariate classification used in the step selection function (SSF) and resource gradient function (RGF) models.

| <b>Environmental factor</b>                   | <b>RSF model</b>        |                         | <b>RGF model</b>        |                         |
|-----------------------------------------------|-------------------------|-------------------------|-------------------------|-------------------------|
|                                               | 1 <sup>st</sup> tercile | 3 <sup>rd</sup> tercile | 1 <sup>st</sup> tercile | 3 <sup>rd</sup> tercile |
| mean annual rainfall (mm)                     | < 1197                  | > 1295                  | < 1187                  | > 1296                  |
| cattle density (cattle/square km)             | < 67                    | > 119                   | < 67                    | > 123                   |
| human population density (people/square km)   | < 113                   | > 544                   | < 105                   | > 654                   |
| distance to livestock market (km)             | < 16.1                  | > 33.1                  | < 14.8                  | > 30.4                  |
| distance to nearest major roadway (km)        | < 8.0                   | > 19.3                  | < 8.6                   | > 18.0                  |
| distance to nearest international border (km) | < 28.0                  | > 66.9                  | < 26.4                  | > 54                    |

Supplemental Table S5. Pearson correlation matrix for the predictors used in the resource gradient function (RGF) analysis.

| <b>Environmental factor</b>              | mean annual rainfall | cattle density | human population density | distance to livestock market | distance to roadway | distance to nearest international border |
|------------------------------------------|----------------------|----------------|--------------------------|------------------------------|---------------------|------------------------------------------|
| mean annual rainfall                     | 1                    | 0.131          | 0.339                    | -0.253                       | -0.324              | -0.294                                   |
| cattle density                           | 0.131                | 1              | 0.458                    | -0.513                       | -0.06               | -0.51                                    |
| human population density                 | 0.339                | 0.458          | 1                        | -0.555                       | -0.387              | -0.47                                    |
| distance to livestock market             | -0.253               | -0.513         | -0.555                   | 1                            | 0.328               | 0.373                                    |
| distance to roadway                      | -0.324               | -0.06          | -0.387                   | 0.328                        | 1                   | -0.005                                   |
| distance to nearest international border | -0.249               | -0.51          | -0.47                    | 0.373                        | -0.005              | 1                                        |

Supplemental Figure S6. Location of Uganda (shaded blue) within the continent of Africa.

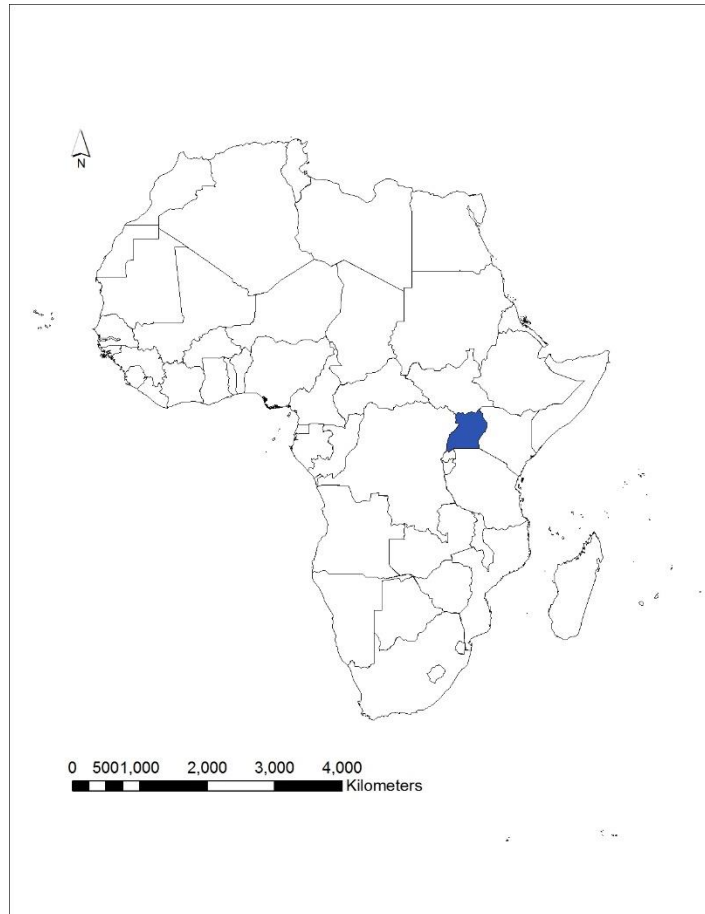

Supplemental Figure S7. A: Geographic locations of foot-and-mouth disease serotype O isolates used for this study. B: Reconstructed dispersal history of FMDV serotype O in Uganda: mapped maximum clade credibility (MCC) trees and 80\% highest posterior density (HPD) regions. MCC trees and HPD regions are based on 100 trees subsampled from the post burn-in posterior distribution. HPD regions were computed for successive time layers and then superimposed. HPD regions are colored according to their time of occurrence.

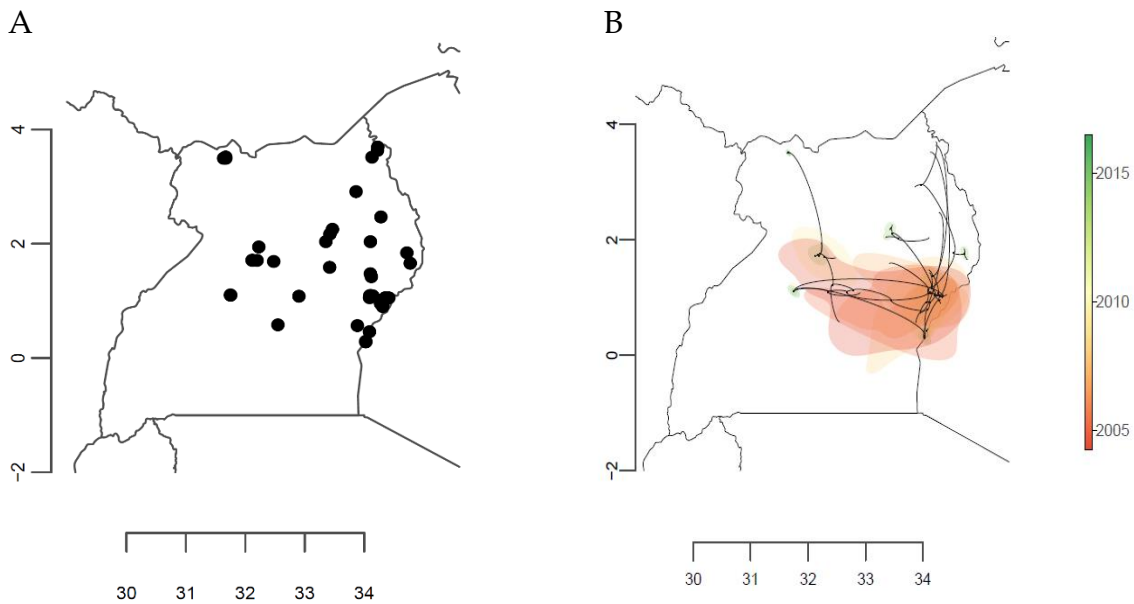

Supplemental Table S8. Sampling data for FMDV sequences.

| Accession Number | Sampling Date | Latitude   | Longitude  |
|------------------|---------------|------------|------------|
| KY558284         | 2014-07-08    | 1.0885     | 34.145467  |
| KY548406         | 2014-08-09    | 2.03641667 | 34.1043333 |
| KY548409         | 2014-08-09    | 2.03766667 | 33.3539167 |
| KY548411         | 2014-08-10    | 2.17041667 | 33.4232833 |
| KY548412         | 2014-08-10    | 2.03766667 | 33.3539167 |
| KY548428         | 2014-08-16    | 1.05336667 | 34.41425   |
| KY548429         | 2014-08-16    | 1.05553333 | 34.3537167 |
| KY558308         | 2014-08-17    | 0.95203333 | 34.2752167 |
| KY558309         | 2014-08-17    | 0.9009     | 34.3114167 |
| KY558311         | 2014-08-17    | 1.00591667 | 34.3336667 |
| KY558310         | 2014-08-17    | 1.00618333 | 34.3341333 |
| KY558314         | 2014-08-23    | 0.95801667 | 34.3051    |
| KY558312         | 2014-08-24    | 1.84185    | 34.7179167 |
| KY548438         | 2014-09-06    | 0.56743333 | 33.8851    |
| KY548422         | 2014-09-13    | 1.0949     | 34.1104833 |
| KY548424         | 2014-09-13    | 1.06496667 | 34.1070333 |
| KY548413         | 2014-09-13    | 1.0569     | 34.0899333 |
| KY548415         | 2014-09-13    | 1.05795    | 34.0936333 |
| KY548417         | 2014-09-13    | 1.08711667 | 34.0944333 |
| KY548418         | 2014-09-13    | 1.07273333 | 34.0925167 |
| KY548419         | 2014-09-13    | 1.09271667 | 34.0939333 |
| KY548425         | 2014-09-20    | 1.42395    | 34.12025   |
| KY548427         | 2014-09-20    | 1.47571667 | 34.1037667 |
| KY548478         | 2014-09-21    | 2.91326667 | 33.8626    |
| KY558336         | 2014-10-16    | 1.65878333 | 34.7742667 |
| KY558321         | 2014-10-18    | 1.58795    | 33.419     |
| KY548462         | 2014-10-27    | 3.69193333 | 34.2273833 |
| KY548464         | 2014-10-27    | 3.51606667 | 34.13115   |
| KY548471         | 2014-10-28    | 3.63388333 | 34.2230833 |
| KY558334         | 2014-11-14    | 2.46958333 | 34.2810167 |
| KY548449         | 2015-01-06    | 0.28281667 | 34.02605   |
| KY548443         | 2015-01-07    | 0.29245    | 34.0252333 |
| KY548450         | 2015-01-07    | 0.28365    | 34.0262667 |
| KY548453         | 2015-01-07    | 0.46048333 | 34.0883    |
| KY558324         | 2015-01-07    | 1.10091667 | 31.7523    |
| KY558325         | 2015-01-07    | 1.10091667 | 31.7523    |
| KY558329         | 2015-01-07    | 1.10091667 | 31.7523    |

|          |            |            |            |
|----------|------------|------------|------------|
| KY558330 | 2015-01-07 | 1.10433333 | 31.7492667 |
| MH367347 | 2015-06-23 | 1.71116667 | 32.1275333 |
| MH367344 | 2015-06-23 | 1.71155    | 32.1127833 |
| MH367346 | 2015-06-23 | 1.70946667 | 32.1973    |
| MH367342 | 2015-06-24 | 1.69023333 | 32.47722   |
| MH367360 | 2015-07-02 | 1.94475    | 32.2265    |
| MH367378 | 2015-09-17 | 0.58108333 | 32.5480333 |
| MH367368 | 2015-11-28 | 3.49683333 | 31.63475   |
| MH367377 | 2015-11-28 | 3.52005    | 31.6695667 |
| MH367375 | 2015-11-29 | 3.49633333 | 31.6710333 |
| KY548474 | 2016-07-02 | 1.08201667 | 32.9019667 |

Supplemental Figure S9. Inferred time-scaled phylogeny of FMDV serotype O VP1 sequences used for this study.

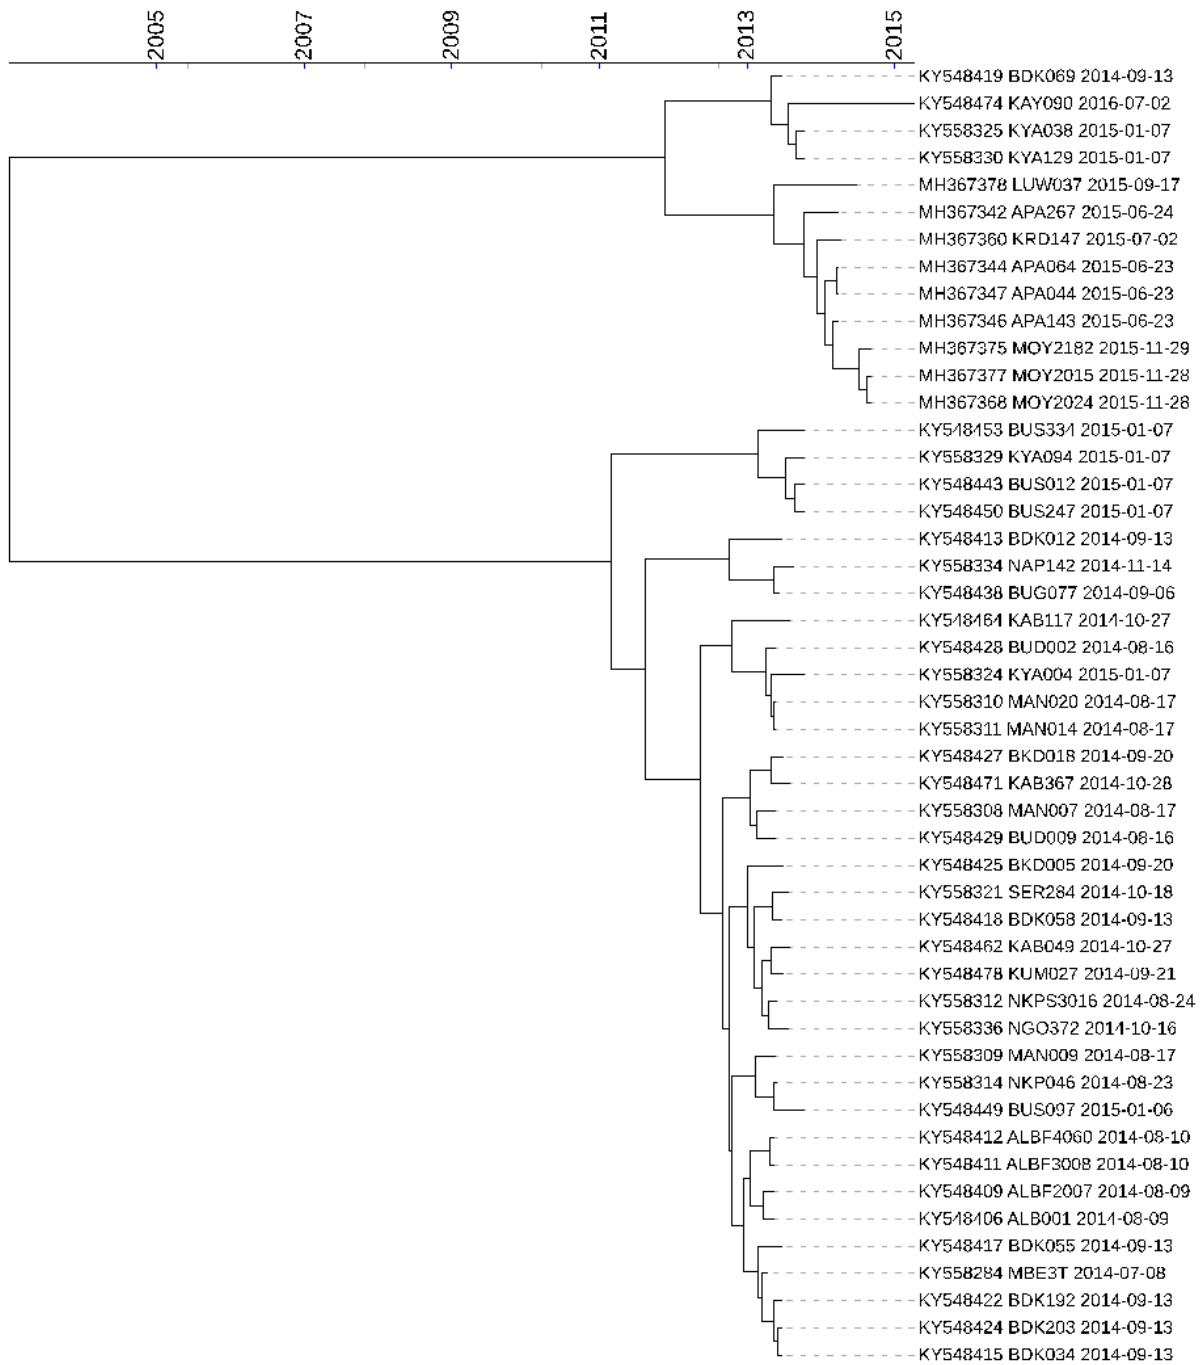

Supplement: s1 [file s1]
